# Supplementary material for: Colorimetric Chemosensor Based on Fe3O4 Magnetic Molecularly Imprinted Nanoparticles for Highly Selective and Sensitive Detection of Norfloxacin in Milk
Source: MDPI journal article supplement (doi:10.3390/foods12020285), 2023-01-07
Supplement: s1 [file s1]

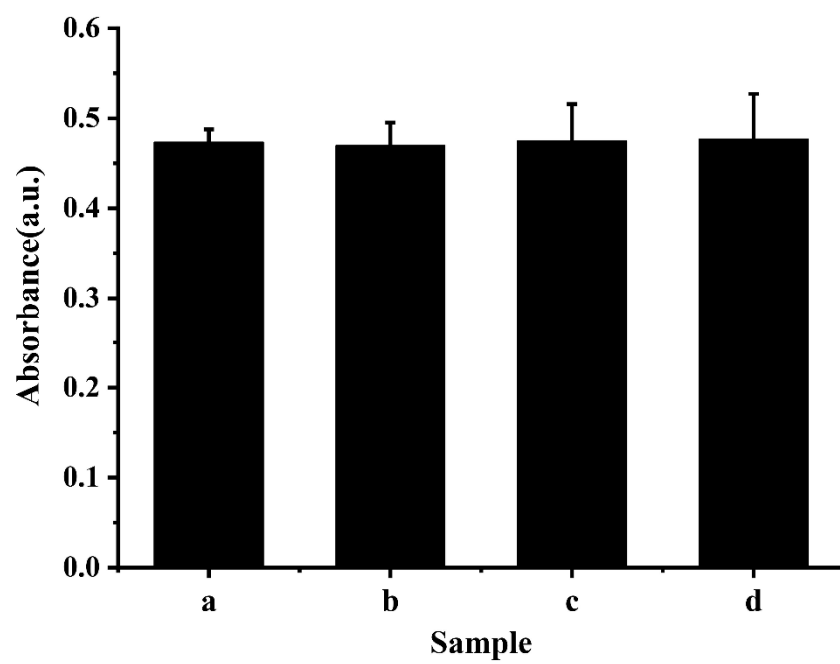

**Figure S1.  $\text{Fe}_3\text{O}_4$  MMIPs NPs colorimetric method for the detection of actual samples (a-d: ultrapure water, milk sample 1, milk sample 2, milk sample 3).**

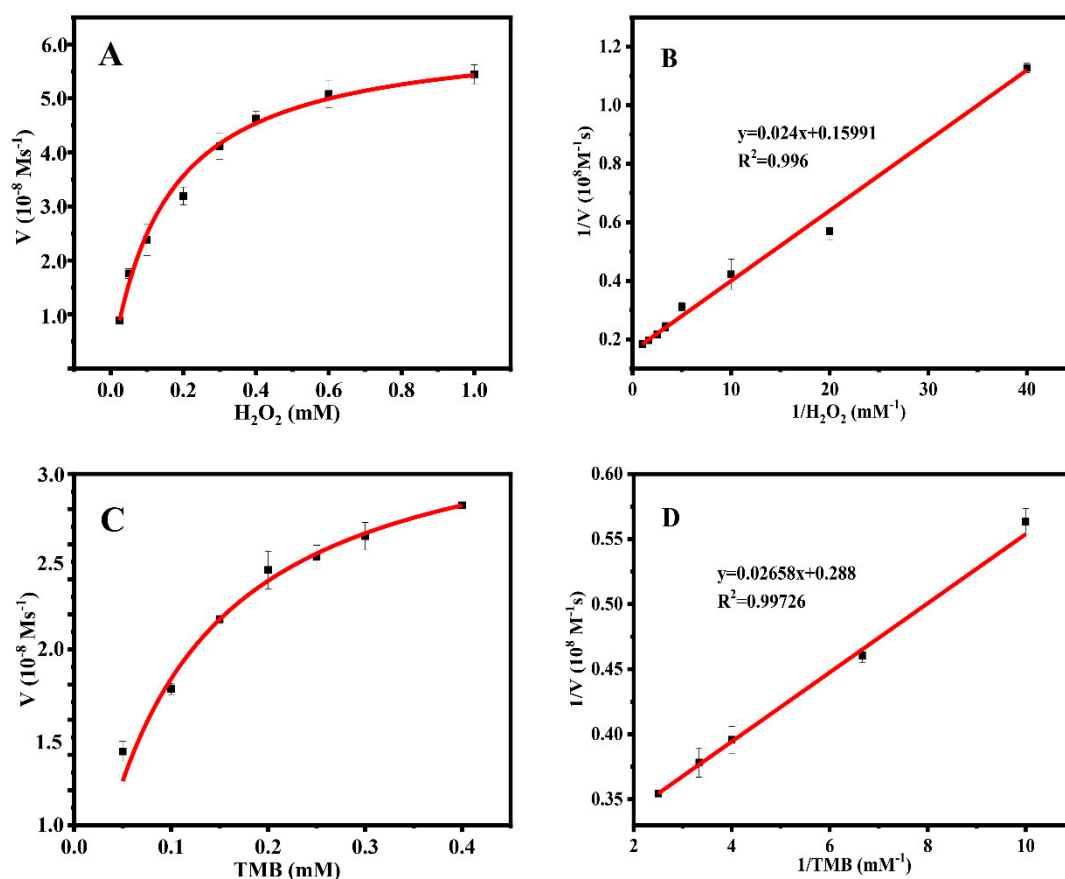

**Figure S2. Kinetic analysis of  $\text{Fe}_3\text{O}_4$  MMIPs NPs' peroxidase-like catalytic activity (A and B: Michaelis-Menten curves and Lineweaver-Burk plot of  $\text{H}_2\text{O}_2$ , C and D: Michaelis-Menten curves and Lineweaver-Burk plot of TMB).**
